# Supplementary material
Source: Springer Nature journal article supplement (https://www.springermedizin.de/resource/supplementary/12998_2006_74_MOESM2_ESM.pdf/9623534)

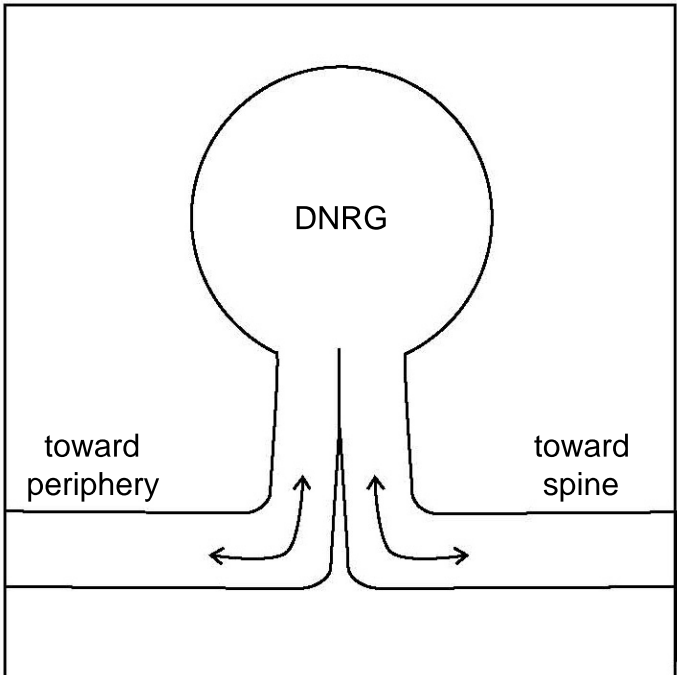

Supplement: MOESM2 [file 9623534]
